A

***msgn1*** ATTTTCTCTAACCGTCCGGAC**AT**GGCGCAAATCGACGTGGATGTGTTTCAC  
 .....  
***msgn1MO*** CATGGCGCAAATCGACGTGGATGTG

B

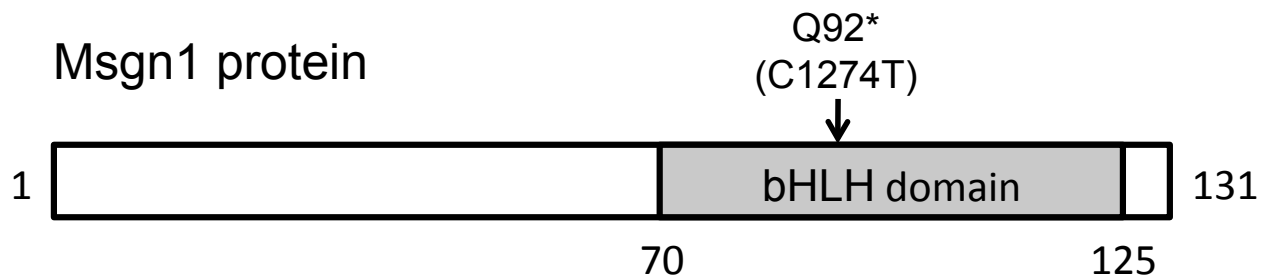

**Fig. S1. Msgn1 loss-of-function strategies.** (A) The *msgn1* morpholino oligonucleotide (*msgn1MO*) was targeted to the initiation ATG codon of the *msgn1* gene. (B) The *msgn1<sup>h273</sup>* allele carries a point mutation that substitutes the cytosine at position 1274 with a thymine, changing the glutamine at position 92 into a stop codon. The resulting protein is truncated in the middle of the first helix of the HLH motif.

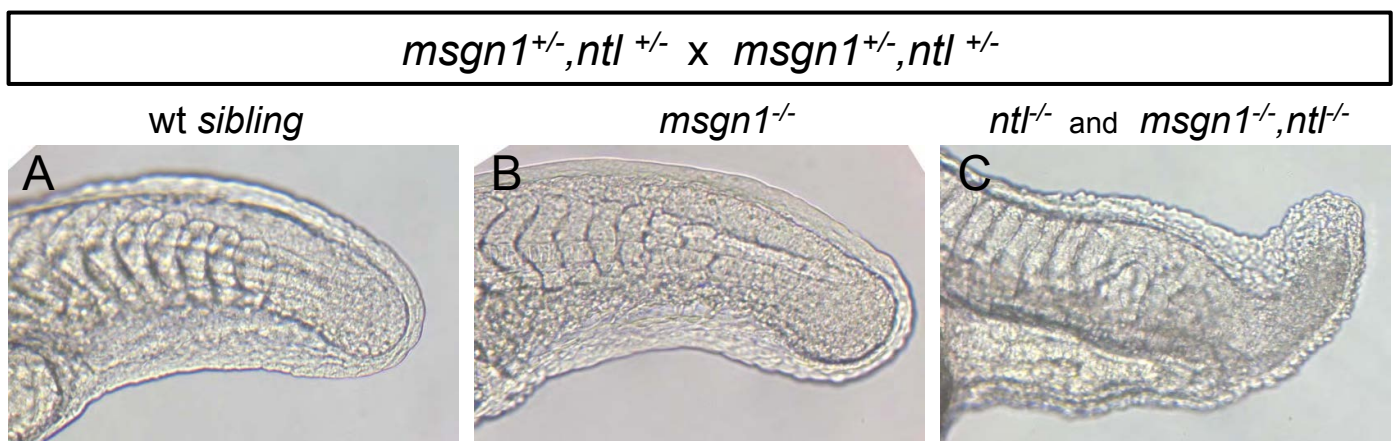

**Fig. S2. Loss of *msgn1* does not enhance the tail deficiency of *ntl<sup>-/-</sup>* mutants.** The progeny of a double heterozygous *msgn1<sup>+/-</sup>;ntl<sup>+/-</sup>* cross were sorted into three distinguishable phenotypic classes and subsequent genotyping showed that embryos with a normal tail phenotype were wt (A), embryos with an enlarged tailbud were *msgn1<sup>-/-</sup>* (B) and embryos with similar severe tail truncations were either *ntl<sup>-/-</sup>* or *msgn1<sup>-/-</sup>;ntl<sup>-/-</sup>* double mutants (C). Genotypes were present at the expected ratios.

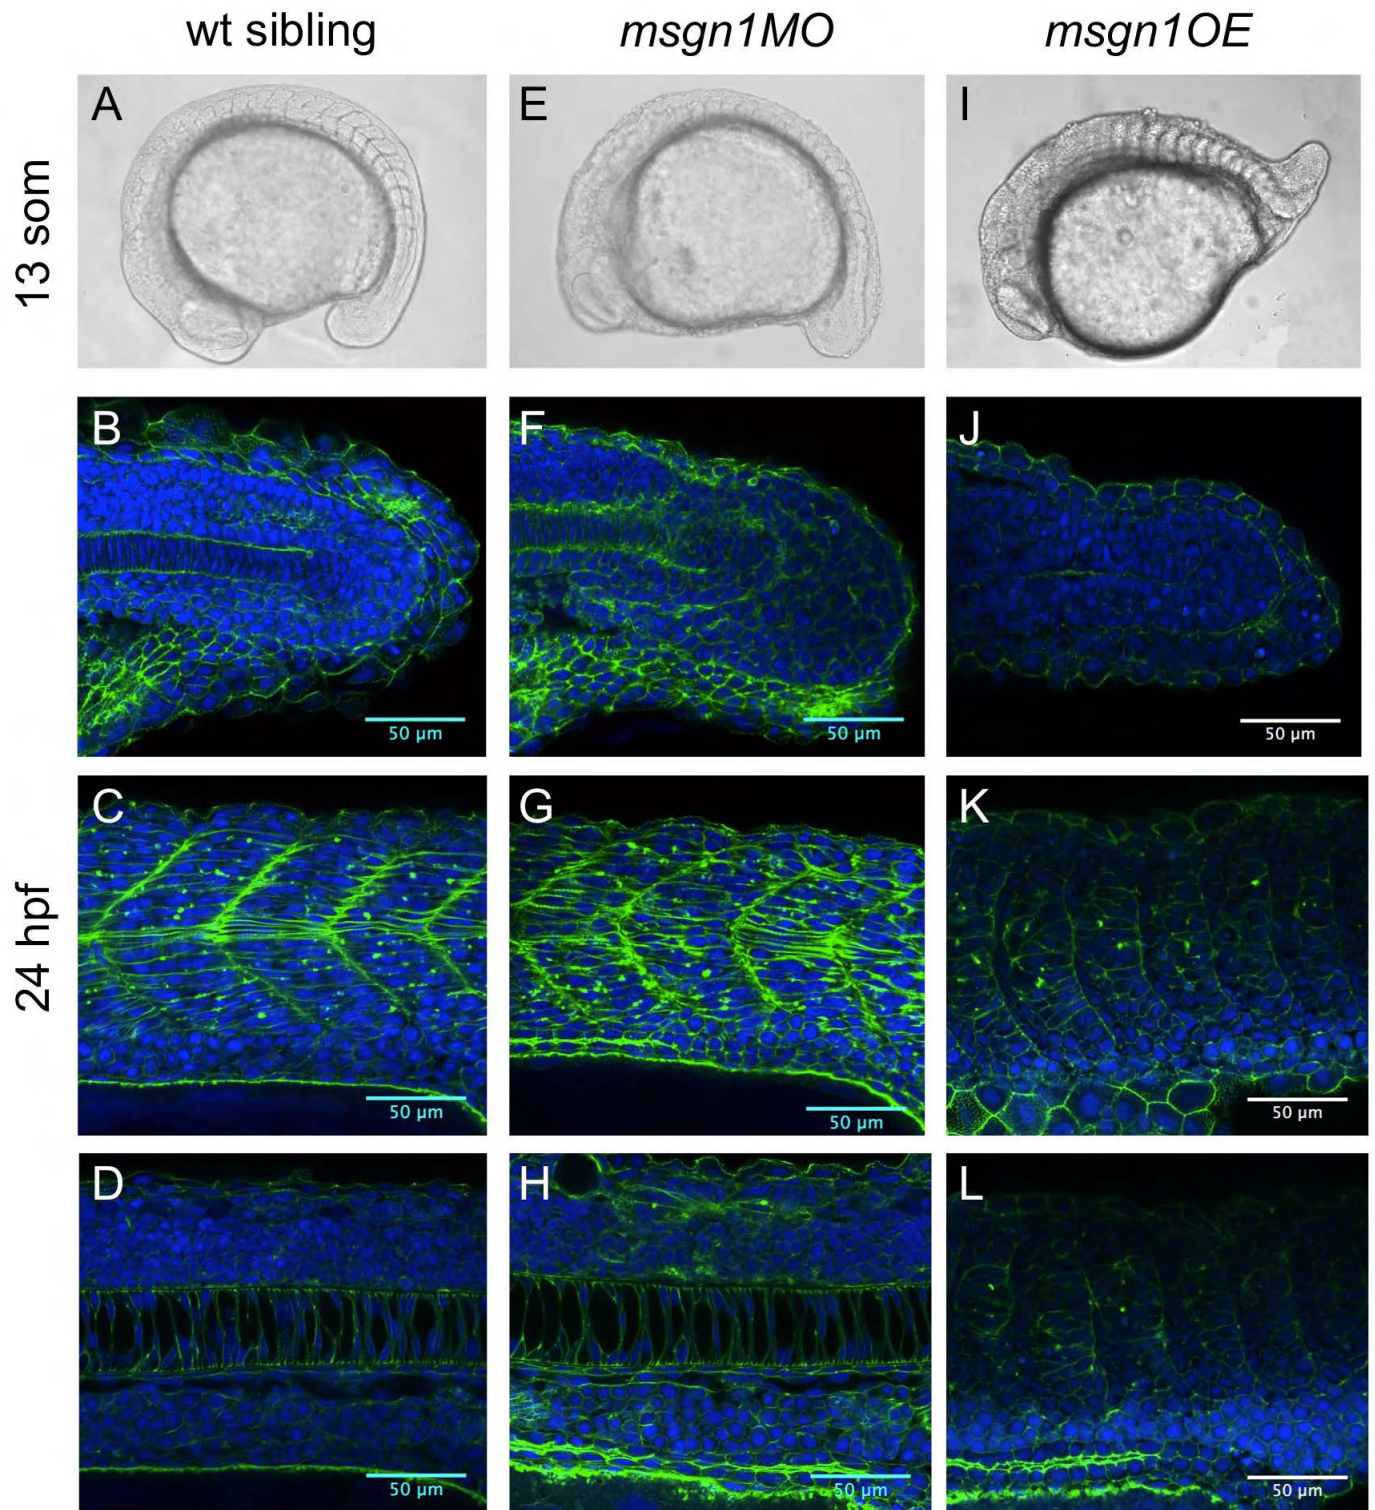

**Fig. S3. *Msgn1* regulates posterior development.** (A,E,I) Live images of wt (A), *msgn1MO*-injected (E) and *msgn1*-overexpressing (I) embryos. (B-D,F-H,J-L) Nuclei (DAPI, blue) and F-actin (phalloidin, green) staining of wt (B-D), *msgn1MO*-injected (F-H) and *msgn1*-overexpressing (J-L) embryos. (B,F,J) Confocal sections at the level of the tailbud (B,F,J), the trunk somites (C,G,K) and the notochord (D,H,L).



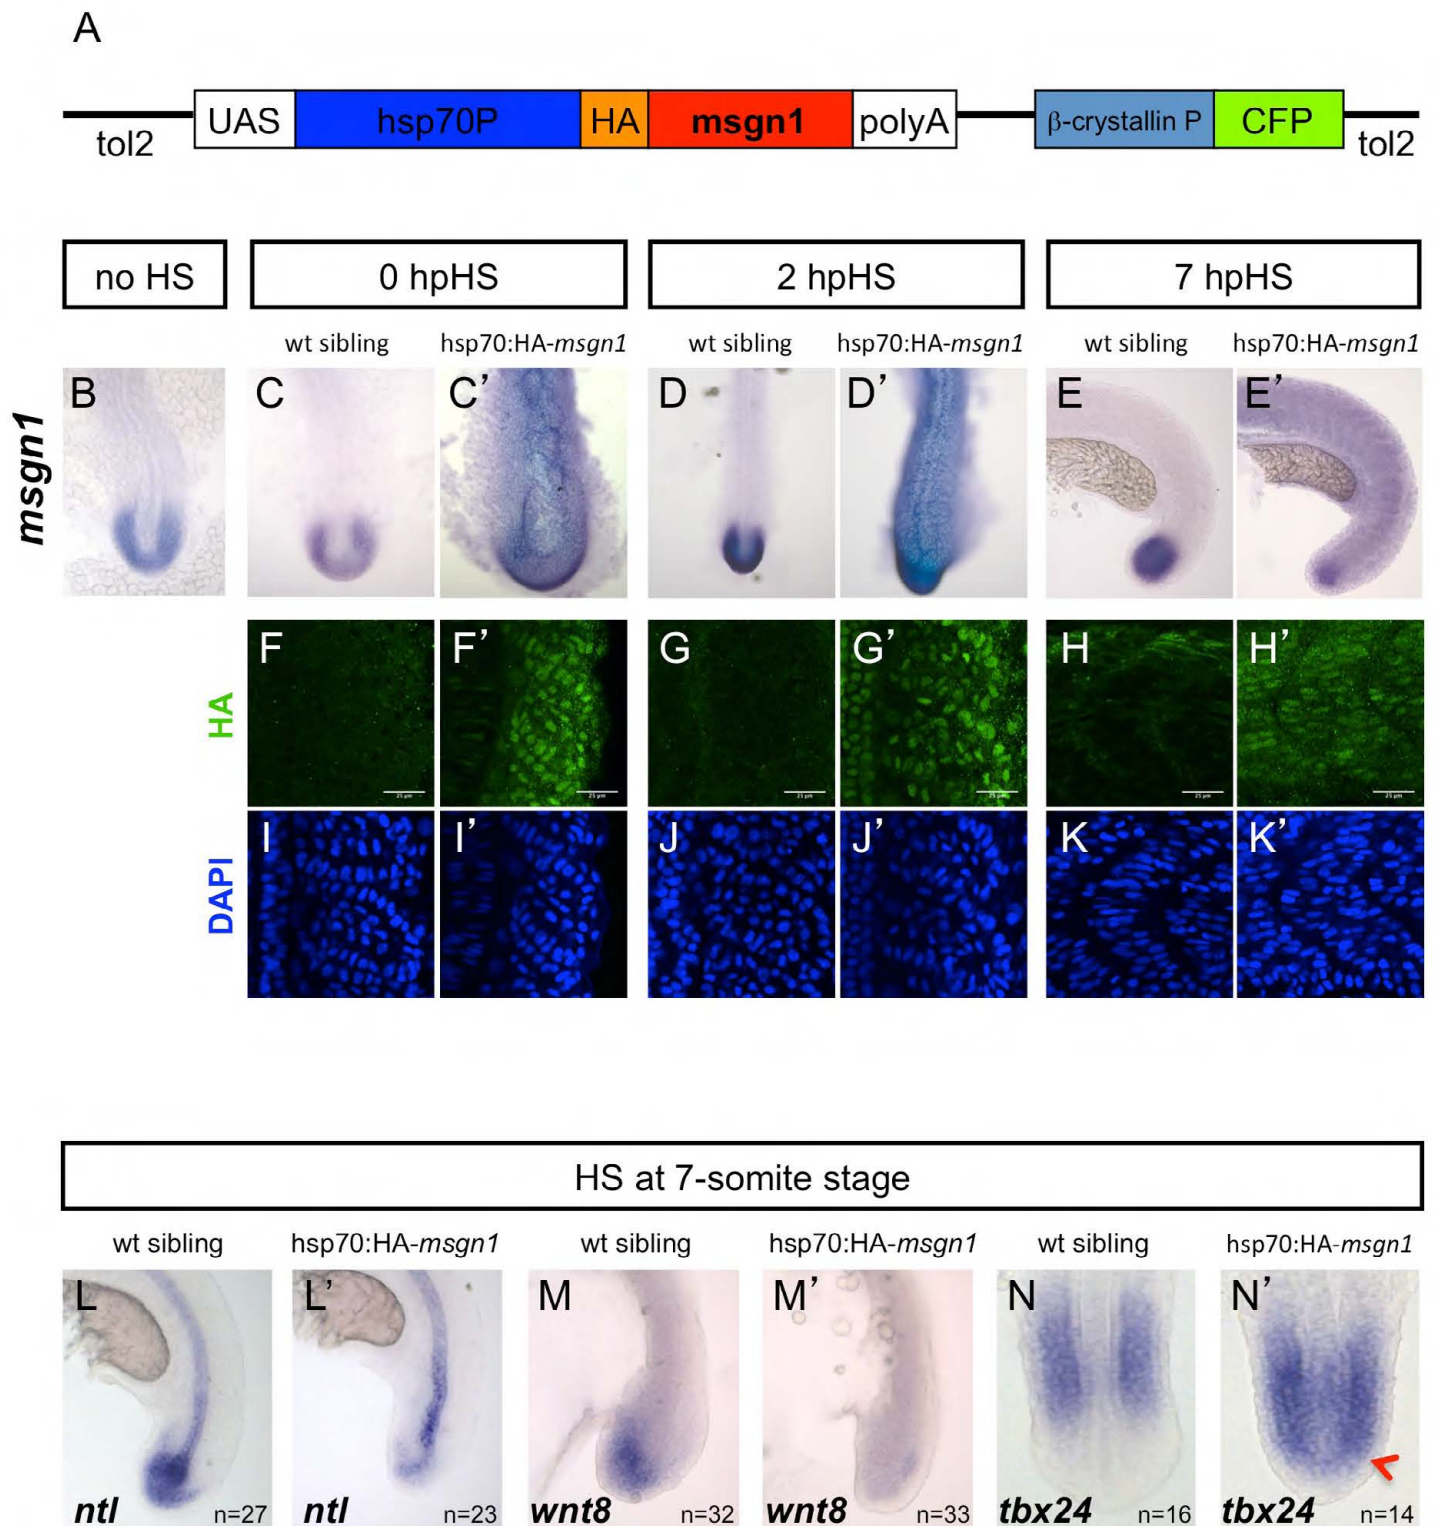

**Fig. S4. Generation and validation of the hsp70:HA-*msgn1* transgenic line.** (A) The construct used to generate the hsp70:HA-*msgn1* transgenic line. The N-terminus of the *msgn1* gene was fused with an HA tag and placed under an *hsp70* promoter. In addition, the  $\beta$ -crystallin promoter was used to drive CFP in the lens to facilitate identification of transgenic embryos. (B-N') Embryos were obtained from a cross between hsp70:HA-*msgn1* heterozygous and wt fish, generating a batch with an expected frequency of 50% transgenics and 50% wt control siblings. (B-E') In situ hybridisation showing *msgn1* mRNA levels in hsp70:HA-*msgn1* transgenic embryos and their wt sibling controls, with no heat shock (B) or heat shocked for 1 hour at the 13-somite stage and fixed immediately (C,C'), 2 hpHS (D,D') and 7 hpHS (E,E'). (F-H') Levels of HA-tagged Msgn1 protein (F-H') at the level of the tenth somite in hsp70:HA-*msgn1* transgenic embryos fixed immediately after heat shock (0 hpHS), 2 hpHS and 7 hpHS and their corresponding control siblings. (I-K') The same embryos as in F-H' counterstained with DAPI to reveal the nuclei. (L-N') Expression of *ntl*, *wnt8* and *tbx24* in hsp70:HA-*msgn1* transgenic embryos and their respective control siblings heat shocked for 1 hour at the 7-somite stage and fixed 7 hpHS. Red arrowhead, ectopic expression of *tbx24* in the tailbud. hpHS, hours post-heat shock.

## *msgn1* expression

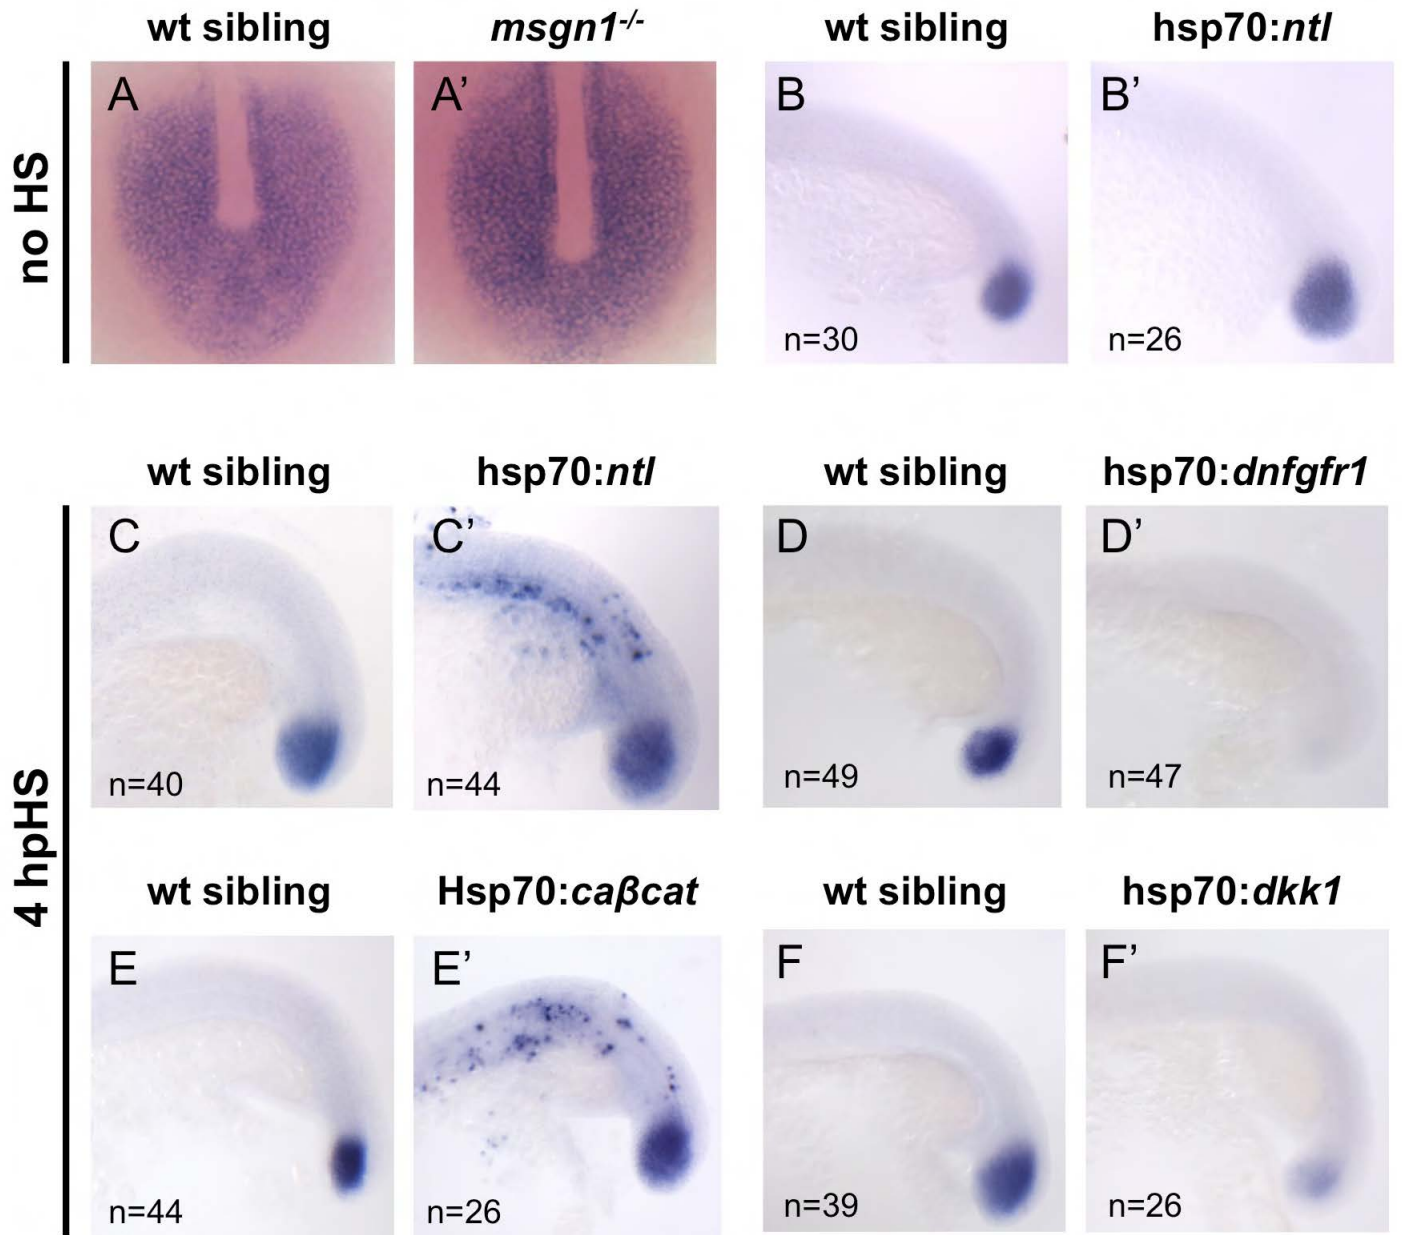

**Fig. S5. Regulation of *msgn1* expression during segmentation.** (A,A') Similar expression of *msgn1* in the presomitic mesoderm of 8-somite stage embryos was detected in wt siblings (A) and *msgn1*<sup>-/-</sup> embryos (A'). (B,B') With no heat shock, a normal pattern of expression of *msgn1* is observed in *hsp70:ntl* injected embryos and their uninjected siblings. (C-F') All embryos were heat shocked for 30 minutes at the 13-somite stage. (C,C') Ectopic expression of *msgn1* is induced in *hsp70:ntl* injected embryos when compared with their uninjected siblings. (D,D') A complete absence of *msgn1* expression is observed in *hsp70:dnfgfr1* transgenic embryos when compared with their siblings. (E,E') Ectopic expression of *msgn1* is induced in *hsp70:caβcat* injected embryos when compared with their uninjected siblings. (F,F') A severe downregulation of *msgn1* expression is observed in *hsp70:dkk1* transgenic embryos when compared with their siblings. Transgenic embryos were obtained from a cross between heterozygous transgenics and wt fish, generating batches with the expected frequency of 50% transgenics and 50% wt control siblings.

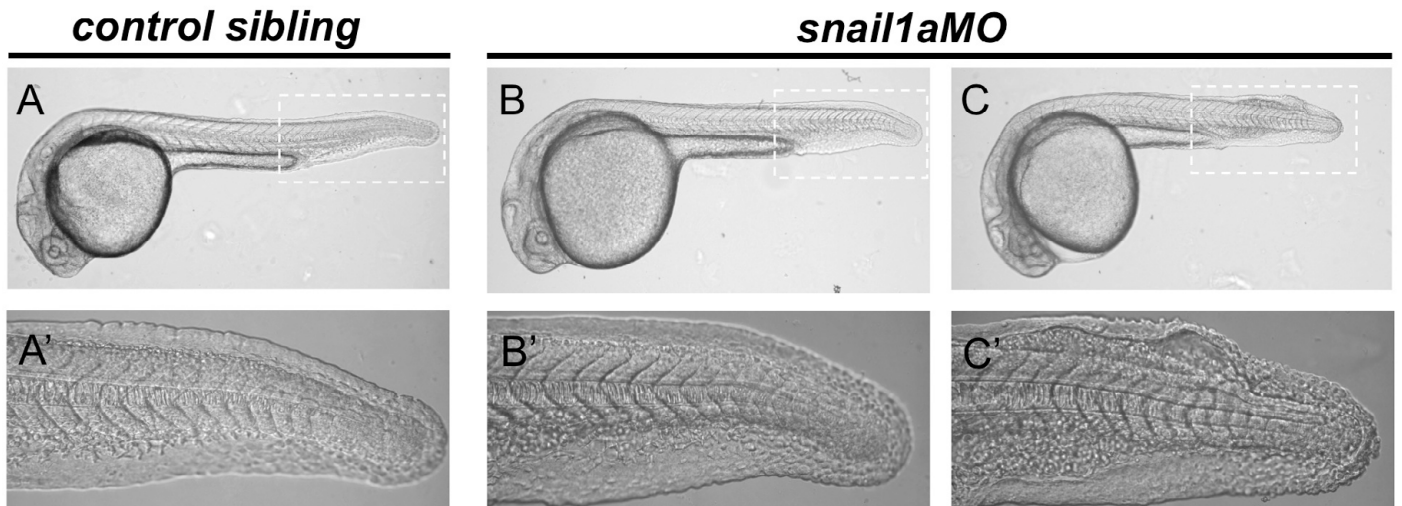

**Fig. S6. The mild *snail1a* loss-of-function phenotype.** Eighty percent ( $n=123$ , three different batches) of the *snail1aMO*-injected embryos (**B,B'**) show an indistinguishable phenotype from controls (**A,A'**) and 20% show a fin-fold phenotype (**C,C'**). (**A'-C'**) Magnification of the tail region corresponding to the embryos shown in A-C.
